# Supplementary material for: A Proinflammatory Diet Is Associated with Higher Risk of Peripheral Artery Disease
Source: Nutrients. 2022 Aug 25;14(17):3490. doi: 10.3390/nu14173490 (PMC9460607; doi:10.3390/nu14173490)
Supplement: Supplementary file 1 [file nutrients-14-03490-s001.zip › Supplementary table S1.pdf]

Table S1. Food parameters included in our study for the calculation of dietary inflammatory index (DII)

| Food parameter                | Overall inflammatory effect score | Global daily mean intake | Standard Deviation (SD) |
|-------------------------------|-----------------------------------|--------------------------|-------------------------|
| Energy (kcal)                 | 0.180                             | 2056                     | 338                     |
| Alcohol (g)                   | -0.278                            | 13.98                    | 3.72                    |
| Protein (g)                   | 0.021                             | 79.4                     | 13.9                    |
| Fiber (g)                     | -0.663                            | 18.8                     | 4.9                     |
| Total fat (g)                 | 0.298                             | 71.4                     | 19.4                    |
| Carbohydrates (g)             | 0.097                             | 272.2                    | 40.0                    |
| Cholesterol (mg)              | 0.110                             | 279.4                    | 51.2                    |
| Omega-3 (g)                   | -0.436                            | 1.06                     | 1.06                    |
| Omega-6 (g)                   | -0.159                            | 10.80                    | 7.50                    |
| Saturated fat (g)             | 0.373                             | 28.6                     | 8.0                     |
| MUFA (g)                      | -0.009                            | 27.0                     | 6.1                     |
| PUFA (g)                      | -0.337                            | 13.88                    | 3.76                    |
| Magnesium (mg)                | -0.484                            | 310.1                    | 139.4                   |
| Niacin (mg)                   | -0.246                            | 25.90                    | 11.77                   |
| Zinc (mg)                     | -0.313                            | 9.84                     | 2.19                    |
| Fe (mg)                       | 0.032                             | 13.35                    | 3.71                    |
| Riboflavin (mg)               | -0.068                            | 1.70                     | 0.79                    |
| Folic acid (μg)               | -0.190                            | 273.0                    | 70.7                    |
| Beta-carotene (μg)            | -0.584                            | 3718                     | 1720                    |
| Caffeine (g)                  | -0.110                            | 8.05                     | 6.67                    |
| Selenium (μg)                 | -0.191                            | 67.0                     | 25.1                    |
| Thiamine (mg)                 | -0.098                            | 1.70                     | 0.66                    |
| Vitamins A (RE)               | -0.401                            | 983.9                    | 518.6                   |
| Vitamins B <sub>6</sub> (mg)  | -0.365                            | 1.47                     | 0.74                    |
| Vitamins B <sub>12</sub> (μg) | 0.106                             | 5.15                     | 2.70                    |
| Vitamins C (mg)               | -0.424                            | 118.2                    | 43.46                   |
| Vitamins E (mg)               | -0.419                            | 8.73                     | 1.49                    |

MUFA, monounsaturated fatty acids; PUFA, polyunsaturated fatty acids.

All food parameters were used as continuous type variables to calculate the DII.
